# 1 **Demand for hospitalization services for COVID-19 patients in Brazil**

2

3 Marcia C. Castro, PhD<sup>1</sup>, Lucas Resende de Carvalho, MS,<sup>2</sup> Taylor Chin, MS,<sup>3</sup> Rebecca Kahn,  
4 MS,<sup>3</sup> Giovanni V. A. França, PhD<sup>4</sup>, Eduardo Marques Macário, PhD<sup>4</sup>, Wanderson Kleber de  
5 Oliveira, PhD<sup>4</sup>

6

7 <sup>1</sup> Harvard T.H. Chan School of Public Health, Department of Global Health and Population, 665  
8 Huntington Avenue, Boston, MA 02115, United States of America

9 <sup>2</sup> Center for Development and Regional Planning, Federal University of Minas Gerais, Avenida  
10 Presidente Antônio Carlos, 6627. Belo Horizonte, MG, 31270-901, Brazil

11 <sup>3</sup> Center for Communicable Disease Dynamics, Department of Epidemiology, Harvard T.H.  
12 Chan School of Public Health, Boston, MA 02115, United States of America

13 <sup>4</sup> Secretariat of Health Surveillance, Brazilian Ministry of Health, Setor de Rádio e Televisão  
14 Norte (SRTV) 701, Via W5 Norte, Edifício PO700. Brasília, Distrito Federal, 70719-040, Brazil

15

16 **Abstract**

17 COVID-19 is now a pandemic and many of the affected countries face severe shortages of  
18 hospital resources. In Brazil, the first case was reported on February 26. As the number of cases  
19 grows in the country, there is a concern that the health system may become overwhelmed,  
20 resulting in shortages of hospital beds, intensive care unit beds, and mechanical ventilators. The  
21 timing of shortage is likely to vary geographically depending on the observed onset and pace of  
22 transmission observed, on the availability of resources, and on the actions implemented. Here we  
23 consider the daily number of cases reported in municipalities in Brazil to simulate twelve  
24 alternative scenarios of the likely timing of shortage, based on parameters consistently reported  
25 for China and Italy, on rates of hospital occupancy for other health conditions observed in Brazil  
26 in 2019, and on assumptions of allocation of patients in public and private facilities. Results  
27 show that hospital services could start to experience shortages of hospital beds, ICU beds, and  
28 ventilators in early April, the most critical situation observed for ICU beds. Increasing the  
29 allocation of beds for COVID-19 (in lieu of other conditions) or temporarily placing all resources  
30 under the administration of the state delays the anticipated start of shortages by a week. This  
31 suggests that solutions adopted by the Brazilian government must aim at expanding the available  
32 capacity (e.g., makeshift hospitals), and not simply prioritizing the allocation of available  
33 resources to COVID-19.

34

## 35 **Introduction**

36 On March 11 the World Health Organization characterized COVID-19 as a pandemic. Caused by  
37 the novel coronavirus SARS-CoV-2, it emerged in China and quickly spread across the country  
38 and beyond. As of March 27, it was present in 202 countries and territories, with 509,164 cases  
39 and 23,335 deaths reported.<sup>1</sup> The clinical course of COVID-19 poses serious challenges to the  
40 health system and may call for drastic rationing decisions.<sup>2,3</sup> Specifically, allocating hospital  
41 beds, intensive care unit (ICU) beds, and mechanical ventilators to COVID-19 patients, besides  
42 the ongoing demand driven by other conditions, is a real or soon to be a real problem.<sup>4-6</sup>

43 Brazil recorded the first COVID-19 case on February 26 and the first death on March 17, both in  
44 São Paulo. In 24 days, the disease had spread to every federal unit. As of March 27, 3,417 cases  
45 and 92 deaths had been reported. As the numbers increase across the country, so does the  
46 demand for hospital services, raising concerns of hospital capacity to cope with that demand.

47 Brazil has a hybrid health system.<sup>7,8</sup> On the one hand, every citizen has free access to the Unified  
48 Health System (SUS). On the other hand, the private sector offers services covered by out of  
49 pocket payments and private insurance plans. About 80% of the Brazilian population relies  
50 solely on SUS, but this number varies widely across the country reflecting striking inequalities.<sup>9</sup>

51 The offer of hospital services is also unequal. As of December 2019, 67% and 48% of the total  
52 available hospital beds and ICU beds, respectively, were offered in the public system.

53 Geographically, the distribution was also unequal, with 9 and 21 beds per 100,000 people in the  
54 North and Southeast regions, respectively.<sup>10</sup>

55 Here we address this concern and simulate the time it would take for hospitals to operate at  
56 capacity, given the current trajectory of COVID-19 in Brazil. We considered different scenarios  
57 of supply and demand and detailed the simulations by day and health macro-region. Since not all

58 services are available in each municipality, the Ministry of Health (MoH) considers the macro-  
59 region to guide the regionalization of health services.

60

## 61 **Methods**

### 62 DATA SOURCES

63 Population by age group and the number of confirmed COVID-19 cases were obtained from the  
64 MoH.<sup>11</sup> Information on available hospital beds, ICU beds, and mechanical ventilators as of  
65 December of 2019 was extracted from the National Registry of Health Establishments (CNES,  
66 <http://cnes.datasus.gov.br/>). We excluded pediatric and obstetric beds, and pediatric, neonatal,  
67 and burn recovery ICU beds. We distinguished hospital beds and ICU beds by type of service  
68 (private and public); this classification was not available for mechanical ventilators. Average  
69 public hospital occupancy in 2019 (detailed by hospital beds and ICU beds) was obtained from  
70 the hospitalization system of the MoH (<http://sihd.datasus.gov.br/>). There was no information on  
71 the occupancy rate for private hospitals (here we assumed the same rate obtained for public  
72 hospitals). Lastly, access to private health insurance in December 2019 was extracted from the  
73 Brazilian Regulatory Agency ([http://www.ans.gov.br/perfil-do-setor/dados-e-indicadores-do-](http://www.ans.gov.br/perfil-do-setor/dados-e-indicadores-do-setor)  
74 [setor](http://www.ans.gov.br/perfil-do-setor/dados-e-indicadores-do-setor)).

75

### 76 STATISTICAL ANALYSIS

77 We conducted forward simulations of the demand for hospital beds, ICU beds, and mechanical  
78 ventilators by health macro-region in Brazil. In the initial phase of a new infectious disease  
79 outbreak, the number of cases grows exponentially.<sup>12,13</sup> Using the number of cases reported to

80 date and estimates of doubling times from the outbreak in China,<sup>14-16</sup> we estimated the number of  
81 future cases each day. As the outbreak spreads, the exponential model becomes less realistic,<sup>13</sup> so  
82 we stopped the simulations once 10% of the population was estimated to be infected.  
83 We used the age structure of each macro-region combined with age-specific attack and severity  
84 rates drawn from the literature. We used attack rates by age from the outbreak in China,<sup>17</sup>  
85 considering a range of  $\pm 3\%$ , and considered that 86% of all infections were undocumented.<sup>18</sup>  
86 Demand for hospitalization was calculated using the severity of cases by age from China.<sup>17</sup> Time  
87 from illness to hospitalization was 3-7 days,<sup>19,20</sup> and length of hospitalization ranged from 7-15  
88 days;<sup>21</sup> for ICU hospitalizations these parameters were 8-15,<sup>19,20</sup> and 7-15,<sup>21,22</sup> respectively. We  
89 considered that 5% of the cases needed ICU admission<sup>21,23</sup> and half of those in ICU needed  
90 mechanical ventilation<sup>20,21</sup> for an average of 5 days.<sup>24</sup> We also simulated an alternative scenario  
91 based on Italy and assumed that 12% of the cases needed ICU admission.<sup>4,6</sup> These parameters  
92 were combined with assumptions of hospital occupancy and type of service to produce twelve  
93 scenarios, summarized in Table 1. We performed 1,000 runs for each scenario, drawing from the  
94  $\pm 3\%$  uncertainty around attack rates, and considered the results that represented the median of  
95 the distribution. All analyses were performed with the use of R software, version 3.6.3, and  
96 Rstudio, version 1.2.5033 (R Foundation for Statistical Computing).

97

98 **Table 1. Parameters considered for simulated scenarios**

| Scenarios | Assumptions                                                                                     |                     |                                                                                              |
|-----------|-------------------------------------------------------------------------------------------------|---------------------|----------------------------------------------------------------------------------------------|
|           | Hospital occupancy                                                                              | Demand for ICU beds | Public x Private Services                                                                    |
| 1         | Beds, ICU beds, and ventilators available for COVID-19 constrained by average occupancy in 2019 | 5% of cases         | Demand for public/private services apportioned by access to private health insurance in 2019 |

|    |                                                                                                 |              |                                                                                              |
|----|-------------------------------------------------------------------------------------------------|--------------|----------------------------------------------------------------------------------------------|
| 2  | Beds, ICU beds, and ventilators available for COVID-19 constrained by average occupancy in 2019 | 5% of cases  | 80% of the demand is for public services                                                     |
| 3  | Beds, ICU beds, and ventilators available for COVID-19 constrained by average occupancy in 2019 | 5% of cases  | Private hospitals temporarily under the control of the state                                 |
| 4  | Beds, ICU beds, and ventilators available for COVID-19 constrained by average occupancy in 2019 | 12% of cases | Demand for public/private services apportioned by access to private health insurance in 2019 |
| 5  | Beds, ICU beds, and ventilators available for COVID-19 constrained by average occupancy in 2019 | 12% of cases | 80% of the demand is for public services                                                     |
| 6  | Beds, ICU beds, and ventilators available for COVID-19 constrained by average occupancy in 2019 | 12% of cases | Private hospitals temporarily under the control of the state                                 |
| 7  | 2019 occupancy reduced by 50%, and services allocated to COVID-19                               | 5% of cases  | Demand for public/private services apportioned by access to private health insurance in 2019 |
| 8  | 2019 occupancy reduced by 50%, and services allocated to COVID-19                               | 5% of cases  | 80% of the demand is for public services                                                     |
| 9  | 2019 occupancy reduced by 50%, and services allocated to COVID-19                               | 5% of cases  | Private hospitals temporarily under the control of the state                                 |
| 10 | 2019 occupancy reduced by 50%, and services allocated to COVID-19                               | 12% of cases | Demand for public/private services apportioned by access to private health insurance in 2019 |
| 11 | 2019 occupancy reduced by 50%, and services allocated to COVID-19                               | 12% of cases | 80% of the demand is for public services                                                     |
| 12 | 2019 occupancy reduced by 50%, and services allocated to COVID-19                               | 12% of cases | Private hospitals temporarily under the control of the state                                 |

99

## 100 **Results**

101 Figure 1 shows the fraction of public hospital beds and ICU beds in each health micro-region, as  
 102 well as the percentage of the population in those units that rely solely on the SUS. Inequities in  
 103 supply and demand exist, and mirror regional inequalities commonly found in social and health  
 104 indicators.<sup>9</sup>

105 As of March 27, 3,417 cases were confirmed in Brazil, 70% concentrated in nine cities: São  
106 Paulo, Rio de Janeiro, Fortaleza, Brasília, Porto Alegre, Salvador, Belo Horizonte, Curitiba, and  
107 Manaus. The growth pattern of the epidemic is not the same across the country. Therefore, we  
108 chose to simulate scenarios for the nine health macro-regions associated with those cities;  
109 combined these macro-regions represent 79.6% of reported cases. In the case of São Paulo and  
110 Brasília, the macro-region includes only the municipality itself. Rio de Janeiro and Manaus have  
111 only one macro-region for the entire state. Fortaleza, Porto Alegre, Belo Horizonte, Salvador,  
112 and Curitiba are in macro-regions that comprise 44, 89, 103, 48, and 93 municipalities,  
113 respectively.

114 Our simulated scenarios indicate that hospital services could start to experience shortages of  
115 hospital beds, ICU beds, and ventilators across macro-regions as early as April (Figure 2). ICU  
116 beds are, by far, the most pressing need. The supply of hospital beds is likely to face shortages  
117 after April 21 and of mechanical ventilators just a few days afterward. The two scenarios for ICU  
118 admission (5% and 12% of the total cases) resulted in about 4-6 days difference. With a 12%  
119 assumption, Brasília would face a shortage of ICU beds by the end of March. Making 50% of  
120 usual occupancy dedicated to COVID-19 postpones shortages for less than a week, and placing  
121 all resources under state control shifts the capacity threshold by up to one week for hospital beds  
122 and mechanical ventilators, and by up to four days for ICU beds. Considering alternative  
123 hypothesis of access to public resources, scenarios 2, 5, 8, and 11 assumed that 80% of the  
124 demand would come from individuals that solely rely on SUS. Since the offer of SUS services  
125 presents regional inequities (Figure 1), the timing of shortage depends both on the share public x  
126 private in each area.

127

128 **Figure 1. Percentage of the population that relies solely on the SUS, percentage of beds**  
129 **available in each health macro-region that are allocated to, and location of the simulated**  
130 **micro-regions.** Thicker black lines define the boundaries of the federal units. Selected health  
131 macro-regions are named after the capital city, and the ID code is also provided.

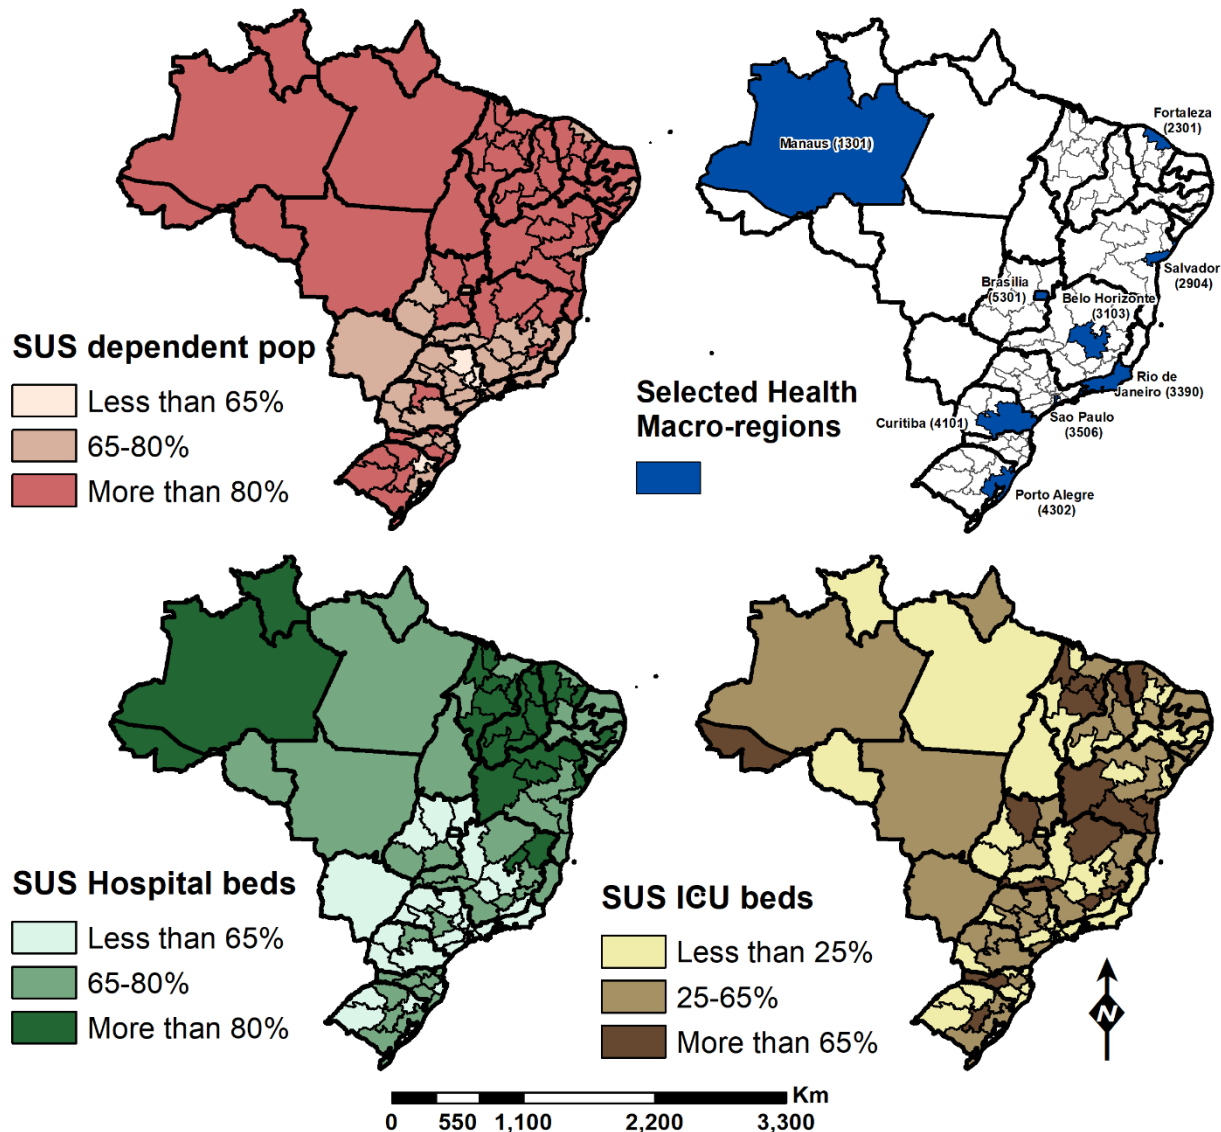

132  
133  
134 The timing of shortage varied by health macro-region. It depends on the observed onset and pace  
135 of transmission. For example, although the first case in Fortaleza was reported on March 15, 18  
136 days after the first case was reported in the country, it took eight days to reach to 100 cases. In  
137 São Paulo, where the first case was reported, the first 100 cases were recorded in 19 days.



138 **Figure 2. Date when hospital services will be at capacity in each simulated scenario.**  
 139 Numbers on the left represent each of the 12 simulated scenarios described in Table1. Names on  
 140 top indicate the municipality of reference to the health macro-region. HB = hospital beds. ICUB  
 141 = ICU beds. MV = mechanical ventilators. Numbers on the table refer to day of the month, and  
 142 cell colors indicate the month. Results reflect the median after 1,000 runs of the model.  
 143

|    | São Paulo | Rio de Janeiro | Brasília | Fortaleza | Belo Horizonte | Porto Alegre | Curitiba | Salvador | Manaus |      |
|----|-----------|----------------|----------|-----------|----------------|--------------|----------|----------|--------|------|
| 1  | 15        | 20             | 13       | 16        | 27             | 20           | 23       | 26       | 26     | HB   |
|    | 12        | 15             | 3        | 8         | 6              | 13           | 13       | 13       | 12     | ICUB |
|    | 26        | 29             | 20       | 20        | 24             | 24           | 24       | 29       | 1      | MV   |
| 2  | 13        | 19             | 12       | 16        | 27             | 20           | 22       | 27       | 27     | HB   |
|    | 10        | 14             | 3        | 9         | 6              | 13           | 13       | 13       | 13     | ICUB |
|    | 24        | 28             | 19       | 21        | 24             | 23           | 23       | 29       | 2      | MV   |
| 3  | 17        | 21             | 14       | 17        | 29             | 21           | 23       | 27       | 27     | HB   |
|    | 17        | 21             | 11       | 11        | 11             | 15           | 13       | 18       | 16     | ICUB |
|    | 26        | 30             | 21       | 21        | 25             | 23           | 27       | 30       | 2      | MV   |
| 4  | 14        | 20             | 13       | 16        | 27             | 20           | 23       | 27       | 27     | HB   |
|    | 7         | 10             | 29       | 5         | 1              | 8            | 8        | 8        | 8      | ICUB |
|    | 20        | 24             | 15       | 16        | 19             | 19           | 18       | 24       | 26     | MV   |
| 5  | 12        | 19             | 12       | 16        | 27             | 20           | 22       | 27       | 27     | HB   |
|    | 5         | 10             | 29       | 5         | 1              | 7            | 7        | 8        | 8      | ICUB |
|    | 18        | 23             | 14       | 17        | 18             | 18           | 17       | 24       | 26     | MV   |
| 6  | 16        | 21             | 14       | 17        | 29             | 21           | 23       | 28       | 27     | HB   |
|    | 11        | 16             | 6        | 7         | 6              | 10           | 8        | 13       | 11     | ICUB |
|    | 21        | 25             | 16       | 17        | 19             | 18           | 21       | 25       | 26     | MV   |
| 7  | 17        | 22             | 16       | 22        | 30             | 22           | 25       | 29       | 30     | HB   |
|    | 14        | 17             | 5        | 13        | 7              | 15           | 15       | 14       | 14     | ICUB |
|    | 28        | 1              | 22       | 26        | 27             | 26           | 26       | 1        | 4      | MV   |
| 8  | 15        | 21             | 15       | 18        | 29             | 22           | 25       | 29       | 30     | HB   |
|    | 12        | 16             | 4        | 10        | 7              | 15           | 14       | 15       | 14     | ICUB |
|    | 26        | 30             | 21       | 22        | 26             | 25           | 25       | 1        | 4      | MV   |
| 9  | 19        | 23             | 16       | 19        | 1              | 23           | 26       | 30       | 30     | HB   |
|    | 19        | 23             | 13       | 13        | 13             | 17           | 15       | 20       | 18     | ICUB |
|    | 29        | 2              | 23       | 23        | 28             | 25           | 29       | 2        | 4      | MV   |
| 10 | 17        | 22             | 16       | 22        | 30             | 22           | 25       | 29       | 30     | HB   |
|    | 9         | 13             | 31       | 9         | 1              | 10           | 9        | 9        | 9      | ICUB |
|    | 23        | 26             | 17       | 22        | 21             | 21           | 20       | 26       | 28     | MV   |
| 11 | 16        | 21             | 15       | 18        | 29             | 22           | 25       | 29       | 30     | HB   |
|    | 7         | 12             | 30       | 6         | 1              | 9            | 9        | 10       | 9      | ICUB |
|    | 21        | 25             | 16       | 18        | 21             | 20           | 20       | 27       | 29     | MV   |
| 12 | 19        | 23             | 16       | 19        | 1              | 23           | 26       | 30       | 30     | HB   |
|    | 14        | 18             | 8        | 9         | 7              | 12           | 10       | 15       | 13     | ICUB |
|    | 23        | 27             | 18       | 19        | 22             | 21           | 23       | 27       | 29     | MV   |

March
  Apr 1-15
  April 19-30
  May

144

## 145 **Discussion**

146 Our simulated scenarios show that, if no change in trajectory is observed, around early April  
147 Brazil would start to face shortages of hospital beds, ICU beds, and ventilators, with ICU beds  
148 being the most immediate problem. The timing of shortages across the country depends on the  
149 onset and the intensity of transmission. Also, the population that relies solely on SUS may bear  
150 the largest burden, further exacerbating the existing inequalities, which calls for a reflection  
151 around equity and ethics in service allocation. Avoiding this scenario is the paramount task of the  
152 MoH.

153 It is unreasonable to expect that all hospital resources could be entirely dedicated to COVID-19.  
154 Although elective procedures can be postponed, other health emergencies compete for resources.  
155 For example, dengue transmission is presently intense and increasing; until March 14 there were  
156 390,684 cases and 106 deaths (60.4% of them among individuals aged 60 or more). In 2019,  
157 with more than 1.5 million cases of dengue reported, 4% (n=55,235) required hospitalization.  
158 Most importantly, 45% of the dengue hospitalizations occurred between March and May (21%  
159 just in May, the month when most likely the hospitals will be operating at capacity because of  
160 COVID-19). In addition, the influenza season is starting, and in 2019 the peak of hospitalizations  
161 occurred in May. Besides beds and ventilators, the stress imposed on the health system  
162 compromises the overall care, which may result in deterioration of the treatment of other  
163 conditions followed by increases in incidence. This scenario was observed during the 2013-14  
164 Ebola outbreak.<sup>25</sup>

165 Shifts in the current trajectory of the epidemic in Brazil may anticipate or postpone the stress on  
166 health services. Importantly, our results are sensitive to assumptions about key parameters in the

167 model, including the doubling time, underreporting rate, age-specific attack and severity rates,  
168 time from illness to hospitalization and ICU, and length of stay estimates. By drawing on  
169 available evidence of how COVID-19 has and is evolving across the globe, our results rely on  
170 and reflect the limitations of the parameters observed in China and on unique patterns reported in  
171 Italy. Given the significant uncertainty in parameter estimates at this phase of the epidemic and  
172 the simplifying assumptions of an exponential model, results from our simulated scenarios  
173 should not be used as precise estimates for the exact timing and extent of capacity thresholds  
174 being reached. Instead, they aim to inform planning and prompt response and do send three  
175 important messages.

176 First, the epidemic of COVID-19 is likely to exacerbate existing inequalities if those that solely  
177 rely on the SUS are hit the hardest. In communities with high population density and poor  
178 infrastructure, it is unfeasible to practice social isolation. In those areas, the transmission is likely  
179 to occur fast and the population mostly relies only on the SUS, quickly overwhelming the health  
180 system. One alternative to alleviate the is to temporarily put all private hospitals under the  
181 control of the state, a measure adopted by Spain.<sup>26</sup> Yet, our results show that this would postpone  
182 shortages by about a week. In fact, solutions that do not involve the opening of new facilities will  
183 have a very short effect on the timing of shortage.

184 Second, there is a short window of opportunity to prepare. The response must be immediate, and  
185 it will demand a concerted effort from society. Repurposing large spaces (e.g., arenas,  
186 convention centers) to build makeshift hospitals for additional beds is critical. Calling on the  
187 industry to produce the necessary equipment (e.g., ventilators, masks, gloves, protective gown,  
188 etc) and to provide it to hospitals at minimum or no cost would also contribute to mitigating the  
189 stress on the system, and to safeguarding the working conditions of health care professionals.

190 Mobilizing community leaders, artists, athletes, and local role models would help to convey a  
191 unique message to the population, and to gather support from the wealthy that could provide  
192 resources to expand the production of medical equipment.  
193 Third, additional actions to contain the transmission and to change the current trajectory of the  
194 epidemic must be taken. Partial shutdown has been initiated in many Brazilian cities, but  
195 compliance is far from ideal. Increasing the availability of tests would allow the government to  
196 comprehensively trace and test all contacts of positive cases, a strategy successfully adopted by  
197 South Korea.<sup>27</sup> Without intensified actions, or even worse, if current actions are loosened, Brazil  
198 may face the need to implement guidelines for rationing health resources,<sup>2</sup> which invariantly call  
199 for difficult decisions.

200

## 201 **Conclusion**

202 Brazil is, in theory, uniquely equipped to respond to the COVID-19 epidemic. It has a free and  
203 universal health system,<sup>7</sup> it has one of largest community-based primary care delivery programs  
204 that serves 74·8% of the population,<sup>28</sup> it can learn from the mistakes and success that other  
205 countries hit by COVID-19 have made, and it has a history of responding to health threats by  
206 implementing governmental action and by generating high-quality scientific evidence, such as  
207 was done when Zika virus hit the country.<sup>29</sup> Yet, the current moment is unique. It requires a  
208 unified message from the country's leadership at various levels: federal, state, and municipal. It  
209 requires the industry to work in solidarity to produce needed inputs without aiming profit but the  
210 collective wellbeing. It requires the population to realize the importance and the urgency to  
211 comply. We hope our results will help to move forward this agenda.

212

## 213 **Contributors**

214 MCC conceived the original, was responsible for data analysis, data interpretation, data  
215 visualization, and wrote the manuscript. LRC was responsible for data curation, data analysis,  
216 programming, and contributed to writing. RK and TC were responsible for programming and  
217 contributed to writing. GVAF, EMM, and WKO were responsible for data curation and  
218 interpretation. All authors approved the final version of the manuscript.

219

## 220 **References**

- 221 1. World Health Organization. Coronavirus disease (COVID-19) outbreak situation.  
222 <https://www.who.int/emergencies/diseases/novel-coronavirus-2019>; 2020.
- 223 2. Emanuel EJ, Persad G, Upshur R, et al. Fair Allocation of Scarce Medical Resources in  
224 the Time of Covid-19. *New England Journal of Medicine* 2020.
- 225 3. Truog RD, Mitchell C, Daley GQ. The Toughest Triage — Allocating Ventilators in a  
226 Pandemic. *New England Journal of Medicine* 2020.
- 227 4. Grasselli G, Pesenti A, Cecconi M. Critical Care Utilization for the COVID-19 Outbreak  
228 in Lombardy, Italy: Early Experience and Forecast During an Emergency Response. *JAMA* 2020.
- 229 5. Tsai TC, Jacobson BH, Jha AK. American Hospital Capacity And Projected Need for  
230 COVID-19 Patient Care. *Health Affairs Blog* 2020; (March 17. Available at:  
231 <https://www.healthaffairs.org/doi/10.1377/hblog20200317.457910/full/>).
- 232 6. Remuzzi A, Remuzzi G. COVID-19 and Italy: what next? *The Lancet* 2020; (Published  
233 online March 12, 2020 [https://doi.org/10.1016/S0140-6736\(20\)30627-9](https://doi.org/10.1016/S0140-6736(20)30627-9)).

- 234 7. Castro MC, Massuda A, Almeida G, et al. Brazil's unified health system: the first 30  
235 years and prospects for the future. *Lancet* 2019; **394**(10195): 345-56.
- 236 8. Paim J, Travassos C, Almeida C, Bahia L, Macinko J. The Brazilian health system:  
237 history, advances, and challenges. *The Lancet* 2011; **377**(9779): 1778-97.
- 238 9. Menezes Filho N, Kirschbaum C. Education and Inequality in Brazil. In: Arretche M, ed.  
239 Paths of Inequality in Brazil: A Half-Century of Changes. Cham: Springer International  
240 Publishing; 2019: 69-88.
- 241 10. Carvalho LR, Andrade MV, Amaral PVM. Avaliação dos parâmetros de oferta mínimos  
242 para os leitos SUS no Brasil, 2015. *Planejamento e Políticas Públicas - PPP/Ipea* 2020; **In**  
243 **Press**.
- 244 11. Brasil, Ministério da Saúde. População Residente - Estudo de Estimativas Populacionais  
245 por Município, Idade e Sexo 2000-2015 - Brasil. Ministério da Saúde/SVS/CGIAE.  
246 <http://tabnet.datasus.gov.br/cgi/deftohtm.exe?novapop/cnv/popbr.def>; 2014.
- 247 12. Wallinga J, Lipsitch M. How generation intervals shape the relationship between growth  
248 rates and reproductive numbers. *Proc Biol Sci* 2007; **274**(1609): 599-604.
- 249 13. Anderson RM, May RM. Infectious Diseases of Humans: Dynamics and Control. New  
250 York: Oxford University Press Inc.; 1992.
- 251 14. Wu JT, Leung K, Leung GM. Nowcasting and forecasting the potential domestic and  
252 international spread of the 2019-nCoV outbreak originating in Wuhan, China: a modelling study.  
253 *The Lancet* 2020; **395**(10225): 689-97.
- 254 15. Chinazzi M, Davis JT, Ajelli M, et al. The effect of travel restrictions on the spread of the  
255 2019 novel coronavirus (COVID-19) outbreak. *Science* 2020: eaba9757.

- 256 16. Wu JT, Leung K, Bushman M, et al. Estimating clinical severity of COVID-19 from the  
257 transmission dynamics in Wuhan, China. *Nature Medicine* 2020.
- 258 17. Bi Q, Wu Y, Mei S, et al. Epidemiology and Transmission of COVID-19 in Shenzhen  
259 China: Analysis of 391 cases and 1,286 of their close contacts. *medRxiv* 2020:  
260 2020.03.03.20028423.
- 261 18. Li R, Pei S, Chen B, et al. Substantial undocumented infection facilitates the rapid  
262 dissemination of novel coronavirus (SARS-CoV2). *Science* 2020: eabb3221.
- 263 19. Huang C, Wang Y, Li X, et al. Clinical features of patients infected with 2019 novel  
264 coronavirus in Wuhan, China. *The Lancet* 2020; **395**(10223): 497-506.
- 265 20. Wang D, Hu B, Hu C, et al. Clinical Characteristics of 138 Hospitalized Patients With  
266 2019 Novel Coronavirus–Infected Pneumonia in Wuhan, China. *JAMA* 2020; **323**(11): 1061-9.
- 267 21. Guan W-j, Ni Z-y, Hu Y, et al. Clinical Characteristics of Coronavirus Disease 2019 in  
268 China. *New England Journal of Medicine* 2020.
- 269 22. Zhou F, Yu T, Du R, et al. Clinical course and risk factors for mortality of adult  
270 inpatients with COVID-19 in Wuhan, China: a retrospective cohort study. *The Lancet* 2020.
- 271 23. Zhou G, Chi C. A model simulation study on effects of intervention measures in Wuhan  
272 COVID-19 epidemic. *medRxiv* 2020: 2020.02.14.20023168.
- 273 24. Chen J, Fan H, Zhang L, et al. Retrospective Analysis of Clinical Features in 101 Death  
274 Cases with COVID-19. *medRxiv* 2020: 2020.03.09.20033068.
- 275 25. Walker PGT, White MT, Griffin JT, Reynolds A, Ferguson NM, Ghani AC. Malaria  
276 morbidity and mortality in Ebola-affected countries caused by decreased health-care capacity,  
277 and the potential effect of mitigation strategies: a modelling analysis. *The Lancet Infectious*  
278 *Diseases* 2015; **15**(7): 825-32.

- 279 26. Güell O, Santaaulalia I. Spanish government puts private healthcare firms at the orders of  
280 the regions. *El Pais*. 2020 March 16, 2020.
- 281 27. Normile D. Coronavirus cases have dropped sharply in South Korea. What’s the secret to  
282 its success? *Science* 2020; (March 17. [https://www.sciencemag.org/news/2020/03/coronavirus-](https://www.sciencemag.org/news/2020/03/coronavirus-cases-have-dropped-sharply-south-korea-whats-secret-its-success)  
283 [cases-have-dropped-sharply-south-korea-whats-secret-its-success](https://www.sciencemag.org/news/2020/03/coronavirus-cases-have-dropped-sharply-south-korea-whats-secret-its-success)).
- 284 28. Macinko J, Harris MJ. Brazil's Family Health Strategy — Delivering Community-Based  
285 Primary Care in a Universal Health System. *New England Journal of Medicine* 2015; **372**(23):  
286 2177-81.
- 287 29. (Editorial). Zika must remain a high priority. *Nature* 2016; **533**(7603): 291.  
288
